# Supplementary material
Source: Springer Nature journal article supplement (https://www.springermedizin.de/resource/supplementary/13002_2010_201_MOESM5_ESM.pdf/9627376)

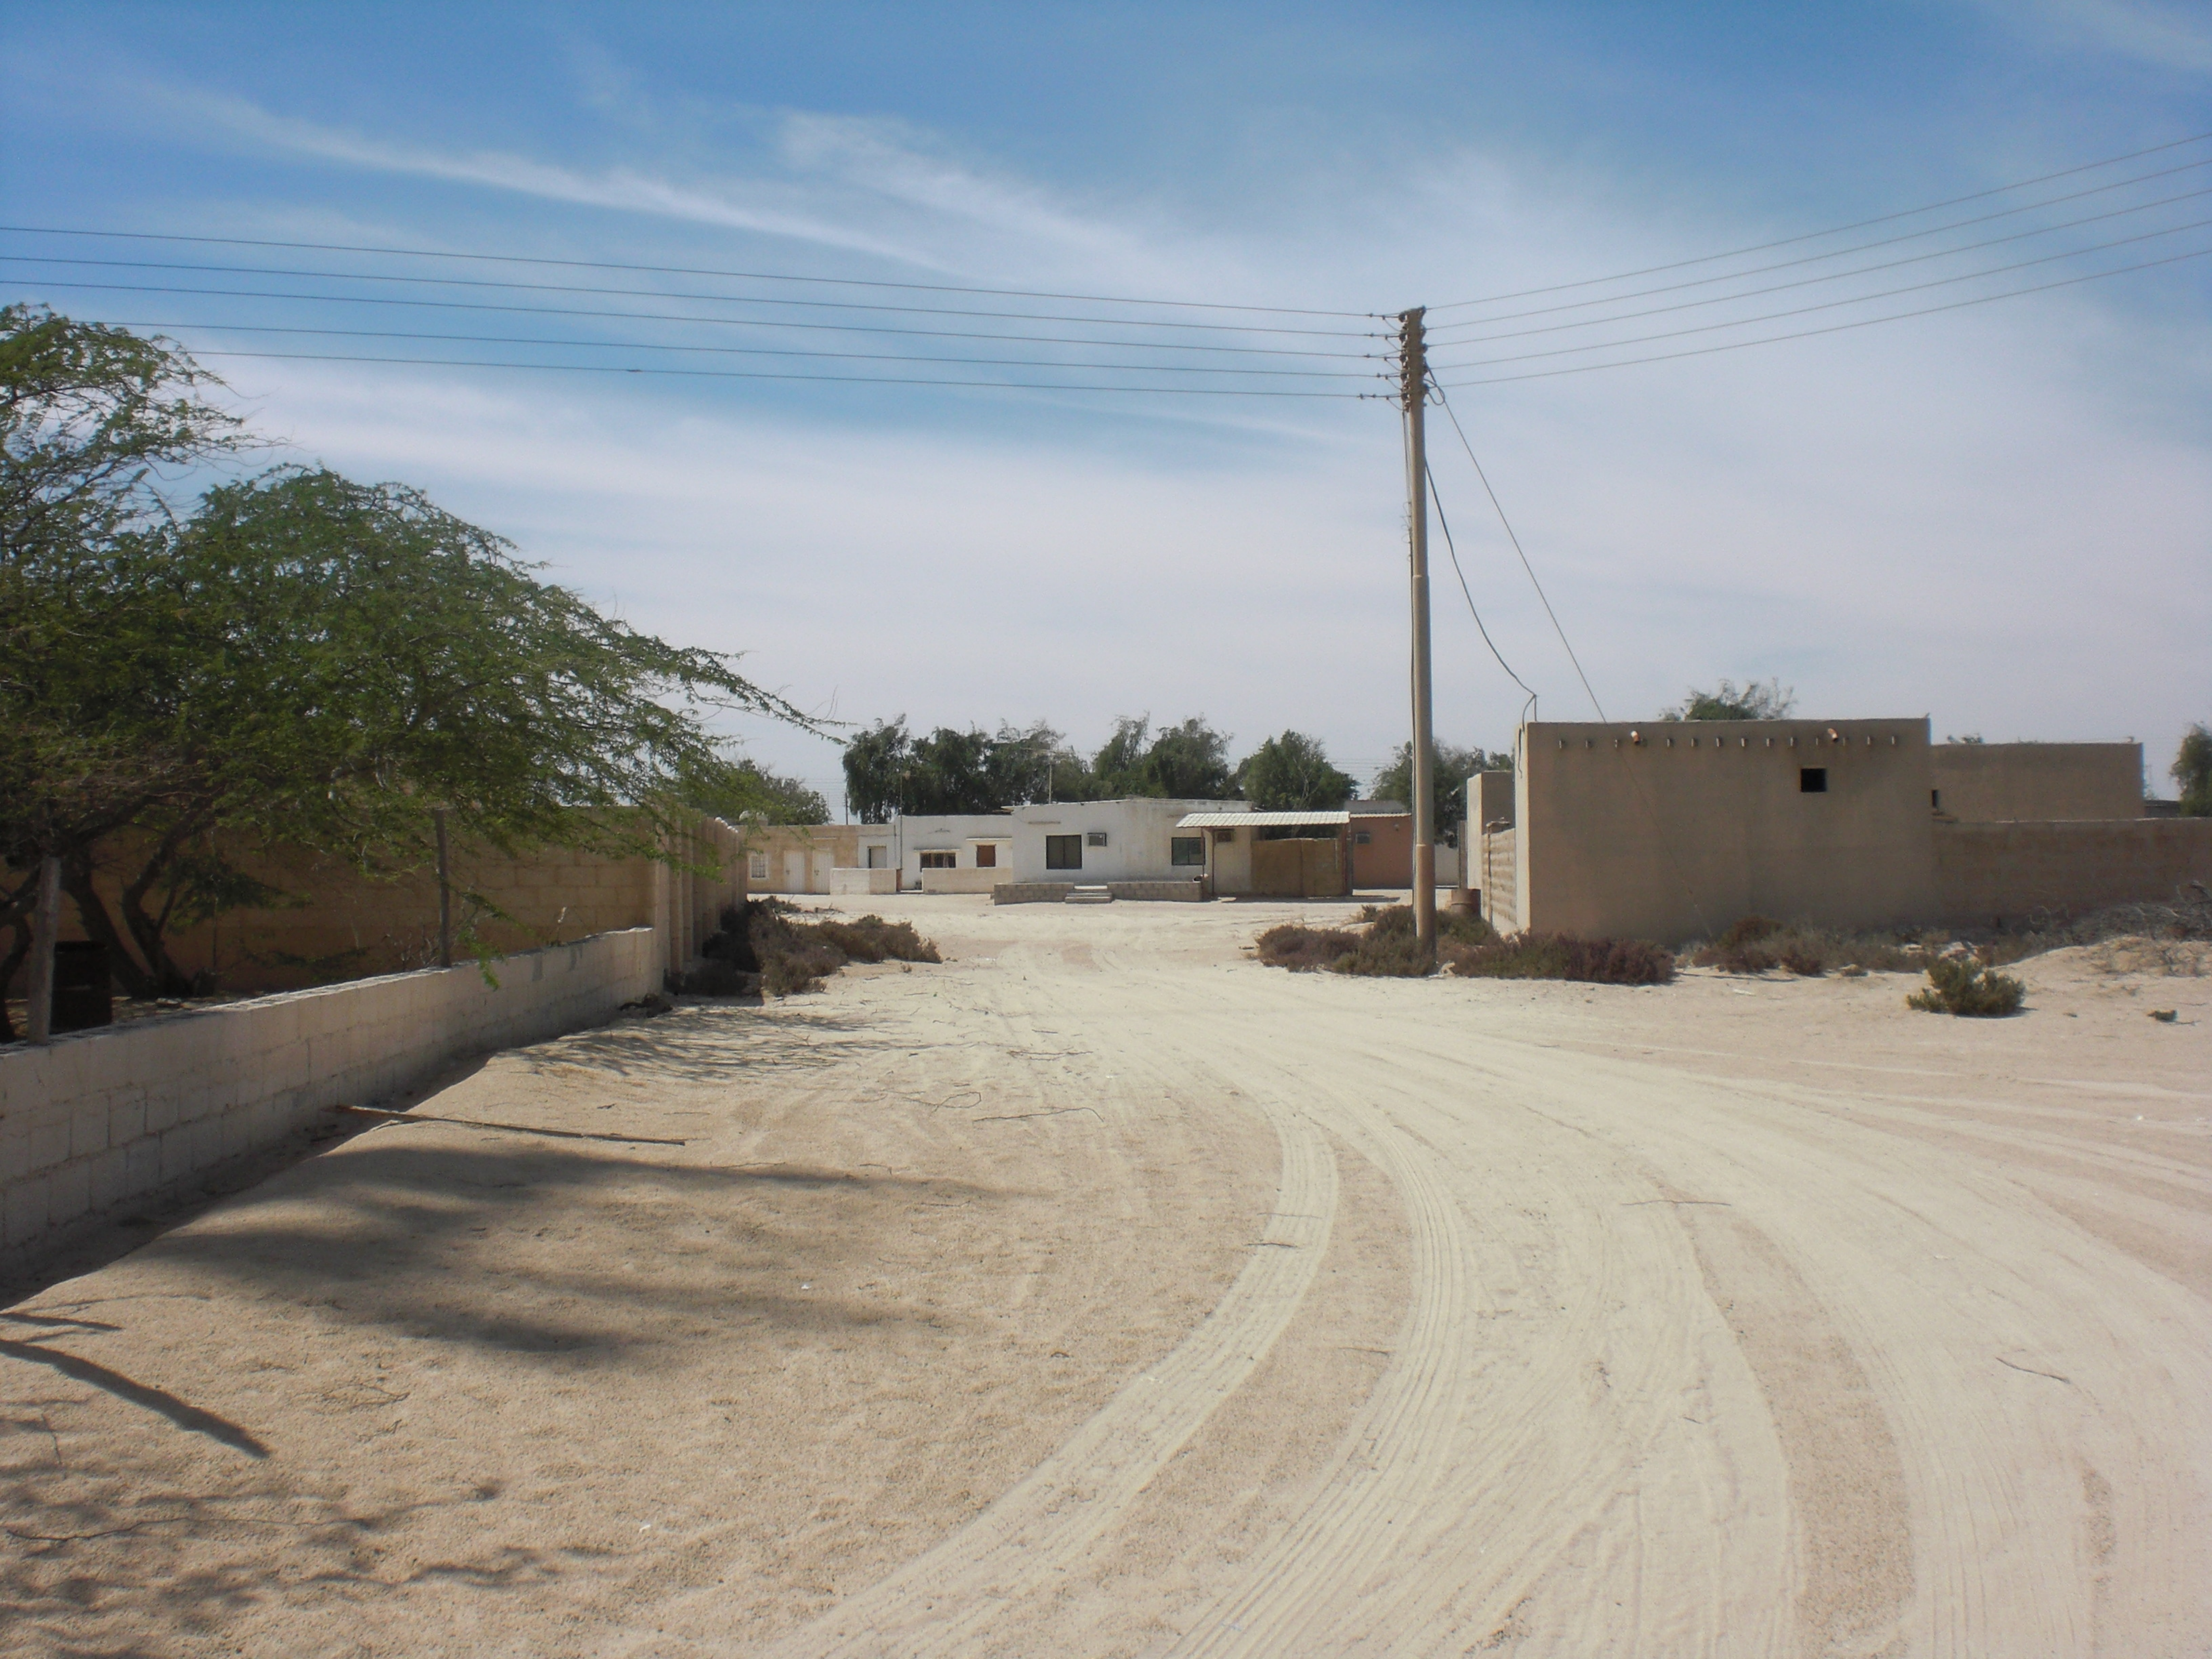

Supplement: MOESM5 [file 9627376]
